# Supplementary material for: TDG suppresses the migration and invasion of human colon cancer cells via the DNMT3A/TIMP2 axis
Source: PubMed Central journal article supplement (PMC8990457; doi:10.7150/ijbs.69266), 2022-03-21
Supplement: ijbsv18p2527s1.pdf [file ijbsv18p2527s1.pdf]

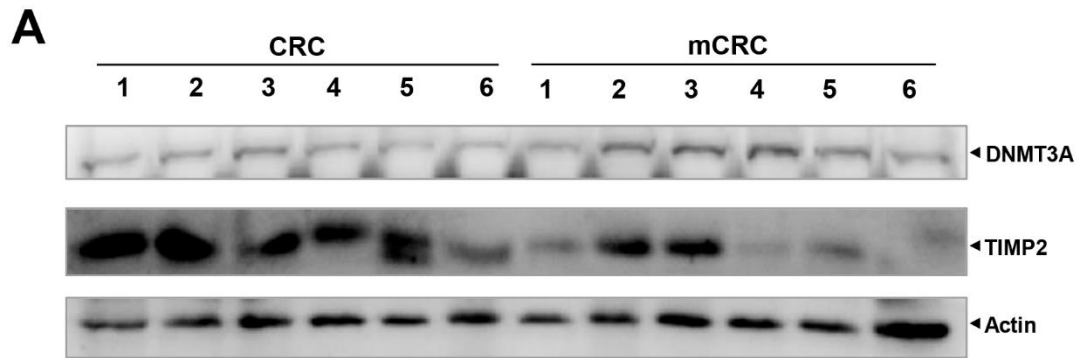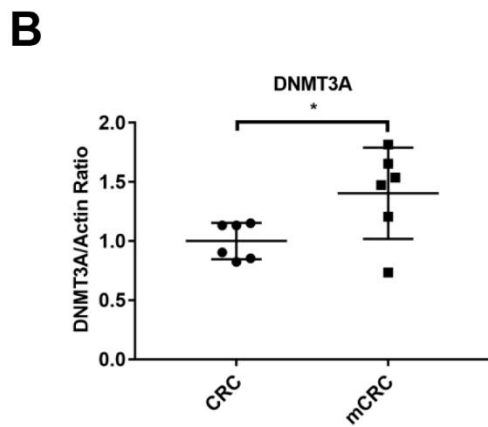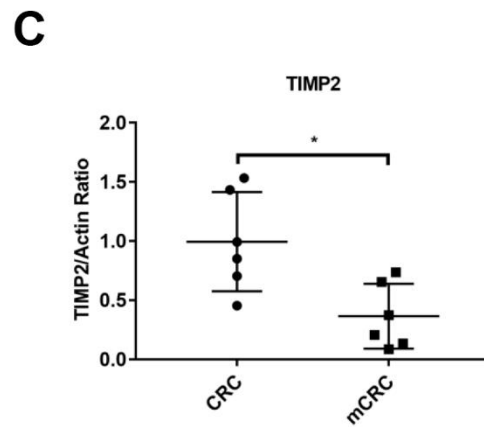

**Supplementary Figure 1. The protein level of DNMT3A and TIMP2 in CRC and mCRC patient tissues. (A) Detection of DNMT3A and TIMP2 by western blotting. (B) Quantification of DNMT3A protein. (C) Quantification of TIMP2 protein. \* $P < 0.05$**

**Table S1: Primers and oligonucleotides used in this study**

| <b>Name</b>           | <b>Sequence (5'-3')</b>    |
|-----------------------|----------------------------|
| GAPDH-Forward         | CAATGACCCCTTCATTGACC       |
| GAPDH Reverse         | GACAAGCTTCCCGTTCTCAG       |
| TDG-Forward           | GGCTAATTGAGAGCGTGGAG       |
| TDG-Reverse           | GCATGGCTTTCTTCTTCCTG       |
| MMP2-Forward          | CTTCTTCCCTCGCAAGCC         |
| MMP-Reverse           | ATGGATTCGAGAAAACCG         |
| MMP9-Forward          | ACGCAGACATCGTCATCC         |
| MMP9-Reverse          | AACCGAGTTGAACCACG          |
| TIMP1-Forward         | GCAATTCCGACCTCGTCATCA      |
| TIMP1-Reverse         | GCAATTCCGACCTCGTCATCA      |
| TIMP2-Forward         | CAGATGTAGTGATCAGGGCCA      |
| TIMP2-Reverse         | AGGGCACGATGAAGTCACAG       |
| DNMT3A-Forward        | TATTGATGAGGCGCACAAAGAGAGC  |
| DNMT3A-Reverse        | GGGTGTTCCAGGGTAACATTGAG    |
| NC                    | UUCUCCGAACGUGUCACGUTT      |
| siDNMT3A-1            | GCCUCAAGAGCAGUGGAAATT      |
| siDNMT3A-2            | GGUCAUUGCAGGAAUGAAUTT      |
| TIMP2primer 1-Forward | GCCCGGCTAATTTCTTGTG        |
| TIMP2primer 1-Reverse | GCCTGTAATCCCAGCACTTT       |
| TIMP2primer 2-Forward | GGAGGTGGCGACAGGGAA         |
| TIMP2primer 2-Reverse | CAGCTCGACTCTGGAGGGCTA      |
| TIMP2primer 3-Forward | CGGGAGGAGGAGCAGAAA         |
| TIMP2primer 3-Reverse | CGCTGCCTTCTACGGATGT        |
| TIMP2-MF1             | TAGGTTGGAGTGTAGTGGCGTA     |
| TIMP2-MR1             | TTCGAAACCAACCTAACGACT      |
| TIMP2-UF1             | TAGGTTGGAGTGTAGTGGTGTA     |
| TIMP2-UR1             | AAAAATTCAAAACCAACCTAACAACT |
| TIMP2-MF2             | TTTGGTGT TTTGGAAGAACGGGCG  |
| TIMP2-MR2             | CGACCCCGATCCCGCTACG        |
| TIMP2-UF2             | TTTGGTGT TTTGGAAGAATGGGTC  |
| TIMP2-UR2             | CCAACCCCAATCCCACTACA       |
